# Supplementary material
Source: publisher figshare collection journal article supplement (https://gsajournals.figshare.com/ndownloader/files/21214956)
Supplement: Supplementary file 1 [file 21214956]

Table S1. List of phenotypes used in GWAS.,,,,,,,,,,
,,,,,,,,,,
Pheno_GWAS,Phenotype abbreviation,Phenotype description,Generation,Total N,Males,Females,Male_age,Female_age,Covariates,Behavioral Software
MA.1,MA.D1_Total_30,"Locomotor test day 1, total distance travelled in 30min (cm)",F34,428,214,214,62.21,61.99,"sex, body weight",Accuscan
MA.2,MA.D2_Total_30,"Locomotor test day 2, total distance travelled in 30min (cm)",F34,428,214,214,62.21,61.99,"sex, body weight",Accuscan
MA.3,MA.D3_Total_30,"Locomotor test day 3, total distance travelled in 30min (cm)",F34,428,214,214,62.21,61.99,"sex, body weight",Accuscan
FC.1,FC.distperiphery,"Open field, distance travelled in periphery (cm)",F34,410,208,202,72,72.2,"sex, age, coat color",Accuscan
FC.2,FC.distcenter,"Open field, distance travelled in the center (cm)",F34,409,206,203,72.02,72.17,"sex, age, coat color",Accuscan
FC.3,FC.propcenter,"Open field, percent time spent in the center (s)",F34,414,208,206,72.07,72.12,"sex, age, coat color",Accuscan
FC.4,FC.pretrainfreeze,"Fear conditioning, pre-train freeazing day 1 ",F34,404,204,200,72.29,71.9,"sex, age, coat color",FreezeFrame software (Actimetrics)
FC.5,FC.freezetocontext,"Fear conditioning, freezing to context day 2",F34,403,202,201,72.23,71.97,"sex, age, coat color",FreezeFrame software (Actimetrics)
FC.6,FC.freezetocue,"Fear conditioning, freezing to cue day 3",F34,408,205,203,72.22,71.97,"sex, age, coat color",FreezeFrame software (Actimetrics)
Kidney.1,Kidney.Glucose_mg_dl,Kidney glucose level (mg/dL),F34,333,164,169,93.83,94.52,"sex, age",
Kidney.2,Kidney.BUN_mg_dl,Kidney blood urea nitrogen level (mg/dL),F34,333,164,169,93.83,94.52,"sex, age",
Kidney.3,Kidney.Creatinine_mg_dl,Kidney creatinine level (mg/dL),F34,333,164,169,93.83,94.52,"sex, age",
Kidney.4,Kidney.Total_Protein_g_dl,Kidney total protein level (g/dL),F34,332,163,169,93.86,94.48,"sex, age",
Kidney.5,Kidney.Albumin_g_dl,Kidney albumin level (g/dL),F34,333,164,169,93.83,94.52,"sex, age",
Kidney.6,Kidney.Microalbumin_mg_dL,Kidney microalbumin level (mg/dL),F34,315,155,160,93.65,94.69,"sex, age",
Muscle.1,Muscle.QF-L,Quadriceps femoris muscle weight (mg),F34,426,213,213,93.99,94.37,"sex, age",
Muscle.2,Muscle.TA-L,Tibialis anterior muscle weight (mg),F34,426,213,213,93.99,94.37,"sex, age",
Muscle.3,Muscle.EDL-L,Extensor digitorum longus muscle weight (mg),F34,426,213,213,93.99,94.37,"sex, age",
Muscle.4,Muscle.GAST-L,Gastrocnemius muscle weight (mg),F34,426,213,213,93.99,94.37,"sex, age",
Muscle.5,Muscle.SOL-L,Soleus muscle weight (mg),F34,426,213,213,93.99,94.37,"sex, age",
Heart_tibia.1,Heart_tibia.body_wt,Body weight measure in heart and tibia measurements (g),F34,216,114,102,94.41,93.91,"sex, age",
Heart_tibia.2,Heart_tibia.ht_wt,Heart weight (mg),F34,216,114,102,94.41,93.91,"sex, age",
Heart_tibia.3,Heart_tibia.tibia,Tibia length (cm),F34,216,114,102,94.41,93.91,"sex, age",
Heart_tibia.4,Heart_tibia.gs_wt,Gastrocnemius weight (mg),F34,216,114,102,94.41,93.91,"sex, age",
Heart_tibia.5,Heart_tibia.ht_wt_b_wt,Heart weight to body weight ratio,F34,216,114,102,94.41,93.91,"sex, age",
Heart_tibia.6,Heart_tibia.ht_wt_tibia_l,Hear weight to tibia length ratio,F34,216,114,102,94.41,93.91,"sex, age",
Heart_tibia.7,Heart_tibia.body_wt_tibia_l,Body weight to tibia length ratio,F34,216,114,102,94.41,93.91,"sex, age",
Heart_tibia.8,Heart_tibia.ht_wt_gs_wt,Heart weight to gastrocnemius weight ratio,F34,216,114,102,94.41,93.91,"sex, age",
CBC.1,CBC.WBC1,Routine CBC white blood cell count (x10^3 cells/uL blood),F34,421,211,210,93.81,94.55,"sex, age",
CBC.2,CBC.RBC1,Routine CBC red blood cell count (x10^6 cells/uL blood),F34,421,211,210,93.81,94.55,"sex, age",
CBC.3,CBC.HGB1,Routine CBC hemoglobin (g/dL),F34,421,211,210,93.81,94.55,"sex, age",
CBC.4,CBC.HCT1,Routine CBC hematocrit (%),F34,421,211,210,93.81,94.55,"sex, age",
CBC.5,CBC.MCV1,Routine CBC mean corpuscular volume (fL),F34,421,211,210,93.81,94.55,"sex, age",
CBC.6,CBC.MCH1,Routine CBC mean corpuscular hemoglobin (pg),F34,421,211,210,93.81,94.55,"sex, age",
CBC.7,CBC.MCHC1,Routine CBC mean corpuscular hemoglobin concentration (g/dL),F34,421,211,210,93.81,94.55,"sex, age",
CBC.8,CBC.CHCM1,Routine CBC cell hemoglobin concentration mean (g/dL),F34,421,211,210,93.81,94.55,"sex, age",
CBC.9,CBC.RDW1,Routine CBC red blood cell distribution width (%),F34,421,211,210,93.81,94.55,"sex, age",
CBC.10,CBC.HDW1,Routine CBC hemoglobin distribution width (g/dL),F34,421,211,210,93.81,94.55,"sex, age",
CBC.11,CBC.MPV1,Routine CBC mean platelet volume (fL),F34,421,211,210,93.81,94.55,"sex, age",
CBC.12,CBC.PLT1,Routine CBC platelets (x10^3 cells/uL blood),F34,421,211,210,93.81,94.55,"sex, age",
CBC.13,CBC.WBC2,Routine WBC differential white blood cell count (x10^3 cells/uL blood),F34,421,211,210,93.81,94.55,"sex, age",
CBC.14,CBC.Neut_percent,Routine WBC differential neutrophil percentage (%),F34,421,211,210,93.81,94.55,"sex, age",
CBC.15,CBC.Neut_num,Routine WBC differential neutrophil number (x10^3 cells/uL blood),F34,421,211,210,93.81,94.55,"sex, age",
CBC.16,CBC.Lymph_percent,Routine WBC differential lymphocyte percentage (%),F34,421,211,210,93.81,94.55,"sex, age",
CBC.17,CBC.Lymph_num,Routine WBC differential lymphocyte number (x10^3 cells/uL blood),F34,421,211,210,93.81,94.55,"sex, age",
CBC.18,CBC.Mono_percent,Routine WBC differential monocyte percentage (%),F34,421,211,210,93.81,94.55,"sex, age",
CBC.19,CBC.Mono_num,Routine WBC differential monocyte number (x10^3 cells/uL blood),F34,421,211,210,93.81,94.55,"sex, age",
CBC.20,CBC.Eos_percent,Routine WBC differential eosinophil percentage (%),F34,421,211,210,93.81,94.55,"sex, age",
CBC.21,CBC.Eos_num,Routine WBC differential eosinophil number (x10^3 cells/uL blood),F34,421,211,210,93.81,94.55,"sex, age",
CBC.22,CBC.Baso_percent,Routine WBC differential basophil percentage (%),F34,421,211,210,93.81,94.55,"sex, age",
CBC.23,CBC.Baso_num,Routine WBC differential basophil number (x10^3 cells/uL blood),F34,421,211,210,93.81,94.55,"sex, age",
CBC.24,CBC.LUC_percent,Routine WBC differential large unstained cell percentage (%),F34,421,211,210,93.81,94.55,"sex, age",
CBC.25,CBC.LUC_num,Routine WBC differential large unstained cell number (x10^3 cells/uL blood),F34,421,211,210,93.81,94.55,"sex, age",
CBC.26,CBC.RETIC_percent ,Retic parameters reticulocyte percent (%),F34,406,207,199,93.85,94.52,"sex, age",
CBC.27,CBC.RETIC_ABS,Retic parameters reticulocyte number (x10^6 cells/uL blood),F34,406,207,199,93.85,94.52,"sex, age",
CBC.28,CBC.CHr,Retic parameters concentration of hemoglobin in reticulocytes (pg),F34,406,207,199,93.85,94.52,"sex, age",
CBC.29,CBC.MCV2,Retic parameters mean reticulocyte volume (fL),F34,406,207,199,93.85,94.52,"sex, age",
CBC.30,CBC.CHCM2,Retic parameters cell hemoglobin concentration mean (g/dL),F34,406,207,199,93.85,94.52,"sex, age",
CBC.31,CBC.CH2,"Retic parameters concentration of hemoglobin in reticulocytes, repeat  (pg)",F34,406,207,199,93.85,94.52,"sex, age",
CBC.32,CBC.CHDW2,Retic parameters cell hemoglobin distribution width (pg),F34,406,207,199,93.85,94.52,"sex, age",
CBC.33,CBC.RDW2,Retic parameters red cell distribution width (%),F34,406,207,199,93.85,94.52,"sex, age",
CBC.34,CBC.HDW2,Retic parameters hemoglobin distribution width (g/dL),F34,406,207,199,93.85,94.52,"sex, age",
CBC.35,CBC.MCV3,"Retic parameters mean reticulocyte volume, repeat (fL)",F34,406,207,199,93.85,94.52,"sex, age",
CBC.36,CBC.CHCM3,"Retic parameters cell hemoglobin concentration mean, repeat (g/dL)",F34,406,207,199,93.85,94.52,"sex, age",
CBC.37,CBC.CH3,"Retic parameters concentration of hemoglobin in reticulocytes, repeat 2 (pg)",F34,406,207,199,93.85,94.52,"sex, age",
CBC.38,CBC.CHDW3,"Retic parameters cell hemoglobin distribution width, repeat (pg)",F34,406,207,199,93.85,94.52,"sex, age",
CBC.39,CBC.RDW3,"Retic parameters red cell distribution width, repeat (%)",F34,406,207,199,93.85,94.52,"sex, age",
CBC.40,CBC.HDW3,"Retic parameters hemoglobin distribution width, repeat (g/dL)",F34,406,207,199,93.85,94.52,"sex, age",
LS.1,Liver_Spleen.Liver,Iron content in liver (ug/kg),F34,428,214,214,93.89,94.47,"sex, age",
LS.2,Liver_Spleen.Liver_mean,Iron content in liver sex mean (ug/kg),F34,428,214,214,93.89,94.47,"sex, age",
LS.3,Liver_Spleen.Liver_STDEV,Iron content in liver STDEV,F34,428,214,214,93.89,94.47,"sex, age",
LS.4,Liver_Spleen.Liver_z,Iron content in liver z score,F34,428,214,214,93.89,94.47,"sex, age",
LS.5,Liver_Spleen.Spleen,Iron content in spleen (ug/kg),F34,427,214,213,93.94,94.41,"sex, age",
LS.6,Liver_Spleen.Spleen_mean,Iron content in spleen sex mean (ug/kg),F34,428,214,214,93.89,94.47,"sex, age",
LS.7,Liver_Spleen.Spleen_STDEV,Iron content in spleen STDEV,F34,428,214,214,93.89,94.47,"sex, age",
LS.8,Liver_Spleen.Spleen_z,Iron content in spleen z score,F34,427,214,213,93.94,94.41,"sex, age",
CC.1,CC.Albino,"Coat color, albino",F34,428,214,214,93.89,94.47,"sex, age",
CC.2,CC.Agouti,"Coat color, agouti",F34,302,149,153,94.44,93.92,"sex, age",
BW.1,BW.Body_weight,Body weight (g),F34,428,214,214,93.89,94.47,"sex, age",
LD.1,LD.Dist_CP_T,"Light dark test, total distance moved from centerpoint (cm)",F39-43,52,28,24,56.43,56.52,"sex, age",Noldus LD
LD.2,LD.Elon_freq,"Light dark test, elongation frequency",F39-43,52,28,24,56.43,56.52,"sex, age",Noldus LD
LD.3,LD.Arena_D,"Light dark test, duration spent in center arena (s)",F39-43,52,28,24,56.43,56.52,"sex, age",Noldus LD
LD.4,LD.Trans,"Light dark test, transition frequency at center point ",F39-43,52,28,24,56.43,56.52,"sex, age",Noldus LD
LD.5,LD.Dark_D,"Light dark test, duration spent in zone dark center point (s)",F39-43,51,27,24,56.63,56.3,"sex, age",Noldus LD
LD.6,LD.Door_D,"Light dark test, duration spent in zone door center point (s)",F39-43,52,28,24,56.43,56.52,"sex, age",Noldus LD
LD.7,LD.Light_D,"Light dark test, duration spent in zone light center point (s)",F39-43,52,28,24,56.43,56.52,"sex, age",Noldus LD
LD.8,LD.LD_lat,"Light dark test, latency in zone 2 dark, center point (s)",F39-43,52,28,24,56.43,56.52,"sex, age",Noldus LD
OF10min.1,OF10min.Center,"Open field, in center duration in 10 minutes (s)",F39-43,473,236,237,56.5,56.45,"sex, age",Noldus open field
OF10min.2,OF10min.Edge,"Open field, In edge duration in 10 minutes (s)",F39-43,473,236,237,56.5,56.45,"sex, age",Noldus open field
OF10min.3,OF10min.percent_C,"Open field, percentage of time spent in center in 10 minutes",F39-43,473,236,237,56.5,56.45,"sex, age",Noldus open field
OF10min.4,OF10min.percent_E,"Open field, percentage of time spent in edge in 10 minutes",F39-43,473,236,237,56.5,56.45,"sex, age",Noldus open field
OF10min.5,OF10min.Tot,"Open field, distance moved in total in 10 minutes (cm)",F39-43,473,236,237,56.5,56.45,"sex, age",Noldus open field
OF10min.6,OF10min.Trans,"Open field, zone transition frequency in 10 minutes",F39-43,473,236,237,56.5,56.45,"sex, age",Noldus open field
OF10min.7,OF10min.Lat,"Open field, in edge latency in 10 minutes (s)",F39-43,473,236,237,56.5,56.45,"sex, age",Noldus open field
OF10min.8,OF10min.Mean,"Open field, mean distance to center in 10 minutes (cm)",F39-43,473,236,237,56.5,56.45,"sex, age",Noldus open field
OF10min.9,OF10min.Min,"Open field, minimum distance to center in 10 minutes (cm)",F39-43,473,236,237,56.5,56.45,"sex, age",Noldus open field
OF10min.10,OF10min.Elong,"Open field, elongation frequency in 10 minutes",F39-43,473,236,237,56.5,56.45,"sex, age",Noldus open field
OF10min.11,OF10min.Imm,"Open field, immobile duration in 10 minutes (s)",F39-43,473,236,237,56.5,56.45,"sex, age",Noldus open field
OF1st5min.1,OF1st5min.Center,"Open field, in center duration in 1st 5 minutes (s)",F39-43,473,236,237,56.5,56.45,"sex, age",Noldus open field
OF1st5min.2,OF1st5min.Edge,"Open field, In edge duration in 1st 5 minutes (s)",F39-43,473,236,237,56.5,56.45,"sex, age",Noldus open field
OF1st5min.3,OF1st5min.percent_C,"Open field, percentage of time spent in center in 1st 5 minutes",F39-43,473,236,237,56.5,56.45,"sex, age",Noldus open field
OF1st5min.4,OF1st5min.percent_E,"Open field, percentage of time spent in edge in 1st 5 minutes",F39-43,473,236,237,56.5,56.45,"sex, age",Noldus open field
OF1st5min.5,OF1st5min.Tot,"Open field, distance moved in total in 1st 5 minutes (cm)",F39-43,473,236,237,56.5,56.45,"sex, age",Noldus open field
OF1st5min.6,OF1st5min.Trans,"Open field, zone transition frequency in 1st 5 minutes",F39-43,473,236,237,56.5,56.45,"sex, age",Noldus open field
OF1st5min.7,OF1st5min.Lat,"Open field, in edge latency in 1st 5 minutes (s)",F39-43,473,236,237,56.5,56.45,"sex, age",Noldus open field
OF1st5min.8,OF1st5min.Mean,"Open field, mean distance to center in 1st 5 minutes (cm)",F39-43,473,236,237,56.5,56.45,"sex, age",Noldus open field
OF1st5min.9,OF1st5min.Min,"Open field, minimum distance to center in 1st 5 minutes (cm)",F39-43,473,236,237,56.5,56.45,"sex, age",Noldus open field
OF1st5min.10,OF1st5min.Elong,"Open field, elongation frequency in 1st 5 minutes",F39-43,473,236,237,56.5,56.45,"sex, age",Noldus open field
OF1st5min.11,OF1st5min.Imm,"Open field, immobile duration in 1st 5 minutes (s)",F39-43,473,236,237,56.5,56.45,"sex, age",Noldus open field
OFsec5min.1,OFsec5min.Center,"Open field, in center duration in 2nd 5 minutes (s)",F39-43,473,236,237,56.5,56.45,"sex, age",Noldus open field
OFsec5min.2,OFsec5min.Edge,"Open field, In edge duration in 2nd 5 minutes (s)",F39-43,473,236,237,56.5,56.45,"sex, age",Noldus open field
OFsec5min.3,OFsec5min.percent_C,"Open field, percentage of time spent in center in 2nd 5 minutes",F39-43,473,236,237,56.5,56.45,"sex, age",Noldus open field
OFsec5min.4,OFsec5min.percent_E,"Open field, percentage of time spent in edge in 2nd 5 minutes",F39-43,473,236,237,56.5,56.45,"sex, age",Noldus open field
OFsec5min.5,OFsec5min.Tot,"Open field, distance moved in total in 2nd 5 minutes (cm)",F39-43,473,236,237,56.5,56.45,"sex, age",Noldus open field
OFsec5min.6,OFsec5min.Trans,"Open field, zone transition frequency in 2nd 5 minutes",F39-43,473,236,237,56.5,56.45,"sex, age",Noldus open field
OFsec5min.7,OFsec5min.Lat,"Open field, in edge latency in 2nd 5 minutes (s)",F39-43,473,236,237,56.5,56.45,"sex, age",Noldus open field
OFsec5min.8,OFsec5min.Mean,"Open field, mean distance to center in 2nd 5 minutes (cm)",F39-43,473,236,237,56.5,56.45,"sex, age",Noldus open field
OFsec5min.9,OFsec5min.Min,"Open field, minimum distance to center in 2nd 5 minutes (cm)",F39-43,473,236,237,56.5,56.45,"sex, age",Noldus open field
OFsec5min.10,OFsec5min.Elong,"Open field, elongation frequency in 2nd 5 minutes",F39-43,473,236,237,56.5,56.45,"sex, age",Noldus open field
OFsec5min.11,OFsec5min.Imm,"Open field, immobile duration in 2nd 5 minutes (s)",F39-43,473,236,237,56.5,56.45,"sex, age",Noldus open field
CC.1,CC.Albino,"Coat color, albino",F39-43,600,305,295,56.68,56.26,"sex, age",
CC.2,CC.Agouti,"Coat color, agouti",F39-43,379,192,187,56.47,56.47,"sex, age",
MA.1,MA.D1_Total_30,"Locomotor test day 1, total distance travelled in 30min (cm)",F39-43,439,226,213,56.43,56.52,"sex, weight",Accuscan
MA.2,MA.D2_Total_30,"Locomotor test day 2, total distance travelled in 30min (cm)",F39-43,439,226,213,56.43,56.52,"sex, weight",Accuscan
MA.3,MA.D3_Total_30,"Locomotor test day 3, total distance travelled in 30min (cm)",F39-43,439,226,213,56.43,56.52,"sex, weight",Accuscan
BW.1,BW.Body_weight_day1,"Body weight, measured on locomotor test day 1 (g)",F39-43,593,301,292,56.29,56.66,"sex, age",
BW.2,BW.Body_weight_day2,"Body weight, measured on locomotor test day 2 (g)",F39-43,595,301,294,56.27,56.68,"sex, age",
BW.3,BW.Body_weight_day3,"Body weight, measured on locomotor test day 3 (g)",F39-43,595,301,294,56.27,56.68,"sex, age",
CC.1,CC.Albino,"Coat color, albino","F34, F39-43",1028,519,509,72.01927,72.32417,"sex, age",
CC.2,CC.Agouti,"Coat color, agouti","F34, F39-43",681,341,340,72.50097,71.84078,"sex, age",
MA.1,MA.D1_Total_30,"Locomotor test day 1, total distance travelled in 30min (cm)","F34, F39-43",940,476,464,25.98375,23.21567,"sex, weight",Accuscan
MA.2,MA.D2_Total_30,"Locomotor test day 2, total distance travelled in 30min (cm)","F34, F39-43",940,476,464,25.98375,23.21567,"sex, weight",Accuscan
MA.3,MA.D3_Total_30,"Locomotor test day 3, total distance travelled in 30min (cm)","F34, F39-43",940,476,464,25.98375,23.21567,"sex, weight",Accuscan
BW.1,BW.Body_weight,Body weight (g),"F34, F39-43",1023,515,508,71.82205,72.5225,"sex, age",
